# Supplementary material
Source: publisher figshare collection journal article supplement (https://karger.figshare.com/articles/dataset/_/5121379)
Supplement: Supplementary file 1 [file 1]

Supplemental Figure S1. *PMN-mediated bleaching of S. aureus USA300 (LAC) and USA300 (LAC agr KO)*

PMN were fed opsonized *S. aureus* strains, either USA300 (LAC) (black) or USA300 (LAC *agr* KO) (grey) at an MOI of 1:1. The percent of fluorescent intracellular bacteria for each strain was determined by FACS. Samples were analyzed at 30 minute time intervals up to 120 minutes after phagocytosis. The data are represented as the mean  $\pm$  standard error of the mean (SEM) (n = 3).
